# Supplementary material for: Multi-Drug Resistance Mediated by Class 1 Integrons in Aeromonas Isolated from Farmed Freshwater Animals
Source: PubMed Central journal article supplement (PMC4908131; doi:10.3389/fmicb.2016.00935), 2016-06-15
Supplement: Table3.pdf [file Table3.pdf]

**Supplementary Table 3** Comparison of antimicrobial resistance between different species of *Aeromonas* spp.

| Antimicrobial agents              | Percentage (no.) of strains resistant |                             |                           |                           |                              |                          |                            |                          |                       |
|-----------------------------------|---------------------------------------|-----------------------------|---------------------------|---------------------------|------------------------------|--------------------------|----------------------------|--------------------------|-----------------------|
|                                   | <i>A. hydrophila</i><br>(n=62)        | <i>A. veronii</i><br>(n=23) | <i>A. sobria</i><br>(n=6) | <i>A. caivae</i><br>(n=7) | <i>A. dhakensis</i><br>(n=4) | <i>A. trota</i><br>(n=4) | <i>A. jandaei</i><br>(n=3) | <i>A. media</i><br>(n=1) | unidentified<br>(n=2) |
| Ampicillin                        | 95.2 (59)                             | 100.0 (23)                  | 100.0 (6)                 | 0                         | 100.0 (4)                    | 0                        | 100.0(3)                   | 100.0 (1)                | 0                     |
| Cefotaxime                        | 3.2 (2)                               | 4.3 (1)                     | 0                         | 0                         | 0                            | 0                        | 0                          | 0                        | 0                     |
| Sulfonamides                      | 35.5 (22)                             | 52.2 (12)                   | 16.7 (1)                  | 0                         | 0                            | 0                        | 0                          | 0                        | 0                     |
| Trimethoprim/<br>sulfamethoxazole | 29.0 (18)                             | 21.7 (5)                    | 16.7 (1)                  | 0                         | 0                            | 0                        | 0                          | 0                        | 0                     |
| Rifampin                          | 53.2 (33)                             | 60.9 (14)                   | 66.7 (4)                  | 71.4 (5)                  | 75.0 (3)                     | 100.0 (4)                | 0                          | 100.0 (1)                | 0                     |
| Nalidixic acid                    | 41.9 (26)                             | 78.3 (18)                   | 33.3 (2)                  | 28.6 (2)                  | 25.0 (1)                     | 25.0 (1)                 | 0                          | 0                        | 0                     |
| Ciprofloxacin                     | 8.1 (5)                               | 4.3 (1)                     | 0                         | 0                         | 0                            | 0                        | 0                          | 0                        | 0                     |
| Norfloxacin                       | 16.1 (10)                             | 4.3 (1)                     | 0                         | 0                         |                              | 0                        | 0                          | 0                        | 0                     |
| Ofloxacin                         | 19.4 (12)                             | 13.0 (3)                    | 0                         | 0                         | 0                            | 0                        | 0                          | 0                        | 0                     |
| Tetracycline                      | 32.3 (20)                             | 34.8 (8)                    | 33.3 (2)                  | 14.3 (1)                  | 0                            | 25.0 (1)                 | 0                          | 0                        | 0                     |
| Doxycycline                       | 19.4 (12)                             | 13.0 (3)                    | 0                         | 0                         | 0                            | 0                        | 0                          | 0                        | 0                     |
| Streptomycin                      | 37.1 (23)                             | 73.9 (17)                   | 83.3 (5)                  | 42.9 (3)                  | 50.0 (2)                     | 50.0 (2)                 | 66.7(2)                    | 0                        | 50.0 (1)              |
| Amikacin                          | 3.2 (2)                               | 8.7 (2)                     | 0                         | 0                         | 0                            | 0                        | 0                          | 0                        | 0                     |
| Chloramphenicol                   | 22.6 (14)                             | 4.3 (1)                     | 0                         | 0                         | 0                            | 0                        | 0                          | 0                        | 0                     |
